# Supplementary material for: Developing prompts from large language model for extracting clinical information from pathology and ultrasound reports in breast cancer
Source: PubMed Central journal article supplement — Radiat Oncol J. 2023 Sep 21;41(3):209–16. doi: 10.3857/roj.2023.00633 (PMC10556835; doi:10.3857/roj.2023.00633), 2023-09-21
Supplement: roj-2023-00633-Supplementary-Fig-1.pdf [file roj-2023-00633-Supplementary-Fig-1.pdf]

**[Conclusion]**

Known breast cancer in LUO with axillary LN metastasis, C6.

**[Finding]**

Lt pain, Lt 2.5h CNB: IDC, Lt axilla LN FNA: metastatic carcinoma, FHx: sister breast cancer (no daughter or unaffected sister)

At MG, Gr b and mass in LUO and enlarged LN in Lt axilla, C6.

At US, homoFatty/P1

3.4x1.9x2.3cm irregular hypoechoic mass in Lt 2h N7cm, D+, C5/6.

Multiple enlarged LNs in Lt axilla level I-III, L5 (cortical thickness 12.5mm)c/w mets.

Negative in Rt.

**Fig. S1.** A representative example of an ultrasound report.
