# Supplementary material for: Developing prompts from large language model for extracting clinical information from pathology and ultrasound reports in breast cancer
Source: PubMed Central journal article supplement — Radiat Oncol J. 2023 Sep 21;41(3):209–16. doi: 10.3857/roj.2023.00633 (PMC10556835; doi:10.3857/roj.2023.00633), 2023-09-21
Supplement: roj-2023-00633-Supplementary-Fig-2.pdf [file roj-2023-00633-Supplementary-Fig-2.pdf]

임종신-1 (DCA\_1  
 림프 조직은 총 여성 부분.  
 1. "L: breast"라고 표기되어 온 신진 상태의 부분 설치된 조직 유형 조직.  
 광범 표기: 있음  
 전체 크기: 11.0 x 10.5 x 7.3 cm  
 피부의 결절: 6.0 x 1.7 cm  
 외견상 특이 소견 기록되지 않음.  
 3차원 내이 관찰 시 주변과 다른 회백색 병변이 존재.  
 병변의 extent: 1.3 x 0.7 x 1.3 cm  
 superior margin으로부터: 2.3 cm  
 inferior margin으로부터: 2.6 cm  
 medial margin으로부터: 7.0 cm  
 lateral margin으로부터: 3.5 cm  
 superficial margin으로부터: 1.6 cm  
 deep margin으로부터: 1.0 cm. 절미의 있음.  
 조직 유형 조직에 특이 소견 관찰되지 않음.  
 mapping 사용함.  
 2. "L: axil"이라고 표기되어 온 신진 상태의 림프결절. 림프절은 광범 모두 포함.  
 3. "L: superior R/M"이라고 표기되어 온 신진 상태의 일부 조직으로 외견상 특이 소견 관찰되지 않음. 결핵의 크기는 5.0 x 2.3 x 0.3 cm임. 연속 절개하여 전부 포함.  
 4. "L: inferior R/M"이라고 표기되어 온 신진 상태의 일부 조직으로 결핵의 크기는 3.3 x 2.2 x 0.5 cm임. 외견상 특이 소견 관찰되지 않음. 연속 절개하여 전부 포함.  
 5. "L: medial R/M"이라고 표기되어 온 신진 상태의 일부 조직으로 결핵의 크기는 6.0 x 2.6 x 0.7 cm임. 외견상 특이 소견 관찰되지 않음. 연속 절개하여 전부 포함.  
 6. "L: lateral R/M"이라고 표기되어 온 신진 상태의 일부 조직으로 결핵의 크기는 2.7 x 1.8 x 0.5 cm임. 외견상 특이 소견 관찰되지 않음. 연속 절개하여 전부 포함.  
 (ink code: red: superior, yellow: inferior, green: medial, blue: lateral, black: deep)  
 (slide set): 1-3: 림프 조직 대표 포함, 4-7: medial 0.5 cm 간격 mapping, 8: medial RM (medial 2.3 cm), 9-10: lateral 0.5 cm 간격 mapping, 11: lateral RM (lateral 3.5 cm), 12-13: Lt. superior R/M, 14: Lt. inferior R/M, 15-16: Lt. medial R/M, 17: Lt. lateral R/M, A: Lt. level 3)  
 MICRO (18 HE)  
 DIAGNOSIS:  
 Breast, left, breast conserving surgery;  
 INVASIVE DUCTAL CARCINOMA with microcapillary feature, residual  
 Post-operative chemotherapy status

Previous pathology report: C 20 1457 (INVASIVE DUCTAL CARCINOMA)  
 - Invasive tumor size: 1.5 x 0.4 x 2.0 cm  
 - Tumor extent including DCIS: 1.5 x 0.4 x 2.5 cm  
 - N-clear grade: 3/3  
 - Histologic grade: IUII  
 - In situ component: DCIS, pT1mi, minimal, around the tumor, microcomedo type, intermediate grade  
 Tumor border: infiltrative  
 Microcalcification: present  
 - Lymphatic vessel: present, minimal  
 - Vascular emboli: absent  
 - Surgical margins:  
 superior margin: clear  
 inferior margin: clear  
 medial margin: clear  
 lateral margin: clear  
 superficial margin: clear  
 deep margin: clear (safety margin: 2 mm by invasive carcinoma)  
 - Number of metastatic lymph nodes: 1  
 - Number of examined lymph nodes: 11  
 (Rt: level 1, 1/11)  
 Associated findings: fibrocartilaginous change  
 Tissue located: "Lt. superior R/M", "Lt. medial R/M" and "Lt. lateral R/M"; excision:  
 No tumor involvement  
 Note) 조직학적 구분법 (histologic mapping)를 시행하였습니다.  
 병리 검사 번호: S 70-0045848 (9)  
 검사 결과:  
 Estrogen Receptor alpha: Positive in 90%  
 Progesterone Receptor: Positive in 10%  
 - HER2: Positive in 50-75%  
 - Ki-67: Negative (1/3)  
 - Ki-67: Positive in 24%  
 - Cytokeratin 5-6: Negative  
 Androgen Receptor: Positive in 70%

Fig. S2. A representative example of a surgical pathology report.
